# Supplementary material for: The generation and analyses of a novel combination of recombinant adenovirus vaccines targeting three tumor antigens as an immunotherapeutic
Source: PubMed Central journal article supplement (PMC4741610; doi:10.18632/oncotarget.5181), 2015-09-07
Supplement: oncotarget-06-31344-s001.pdf [file oncotarget-06-31344-s001.pdf]

## SUPPLEMENTARY DATA

### METHODS

A549 cells were inoculated at an MOI of 555 VP/cell with Ad5 [E1-, E2b-]-CEA. Cells were incubated for 48 hours at 37°C in 5% CO<sub>2</sub>. After 48 hours cells were harvested and washed with PBS and freeze/thawed three times. The whole cell lysate was heated at 70°C for 10 minutes prior to loading on the gel. Recombinant CEA control was loaded at 30 ng/lane and the prepared lysate at 20 uL/lane. Sample loading buffer was included as an additional negative control and the

positive controls were Magic Mark CP Western Markers and the recombinant CEA. The gel was transferred to a nitrocellulose membrane and blocked with SuperBlock Blocking solution for 60 mins. The membrane was probed with mouse monoclonal anti-CEA primary antibody (1:1000) and a secondary anti-mouse HRP (1:2500) conjugated antibody. The membrane was washed three times then incubated with SuperSignal chemiluminescent reagent and banding was visualized by exposing X-ray film to the membrane followed by development.

**Supplementary Table S1: Serotype 5 adenovirus (Ad5) vectors induce maturation and activation of human DCs**

| Treatment            | MOI    | CD80              | CD83              | CD86        | HLA-DR             |
|----------------------|--------|-------------------|-------------------|-------------|--------------------|
| Control              | 0      | 20.2 (146)        | 33.6 (259)        | 99.5 (4586) | 94.4 (1355)        |
| Ad5 [E1-, E2b-]-null | 10,000 | <b>40.7 (162)</b> | <b>40.9 (253)</b> | 99.2 (3794) | <b>98.0 (4489)</b> |
| Ad5 [E1-, E2b-]-null | 20,000 | <b>47.4 (169)</b> | <b>46.8 (266)</b> | 98.6 (3012) | <b>95.7 (3203)</b> |
| Ad5 [E1-, E2b-]-CEA  | 10,000 | <b>56.8 (189)</b> | <b>48.7 (262)</b> | 99.2 (3877) | <b>98.3 (6553)</b> |
| Ad5 [E1-, E2b-]-CEA  | 20,000 | <b>54.5 (185)</b> | <b>46.6 (271)</b> | 99.1 (3628) | <b>98.0 (6015)</b> |
| Ad5 [E1-, E2b-]-MUC1 | 10,000 | <b>41.4 (167)</b> | <b>42.4 (251)</b> | 98.5 (3178) | <b>96.9 (5227)</b> |
| Ad5 [E1-, E2b-]-MUC1 | 20,000 | <b>46.7 (172)</b> | <b>44.3 (260)</b> | 98.9 (3591) | <b>97.2 (5779)</b> |

Indicated adenovirus vectors were used at a concentration of 10,000 or 20,000 multiplicity of infection (MOI) for infection of human dendritic cells (DCs). Expression of CD80, CD83, CD86 and HLA-DR were analyzed by flow cytometry. Results are expressed in % of positive cells (mean fluorescence intensity).

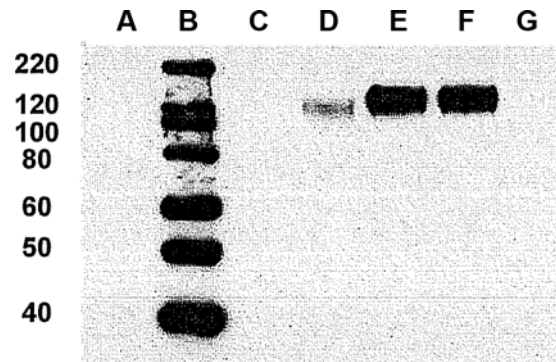

**Supplementary Figure S1: Expression of CEA in A549 cells infected with Ad5 [E1-, E2b-]-CEA.** A549 cells were infected with Ad5 [E1-, E2b-]-CEA and CEA expression was confirmed by Western blot analysis. Recombinant CEA was used as a positive control and uninfected A549 cells served as a negative control. The samples are visualized above in the following order: A. Negative Control, B. Magic Mark XP Western Marker, C. Negative, D. CEA Reference Material (30 ng), E. Ad5 [E1-, E2b-]-CEA lysate (20uL), F. Ad5 [E1-, E2b-]-CEA lysate (20 uL), G. Negative A549 cells.
